# Supplementary material
Source: PubMed Central journal article supplement (PMC9054329)

**APPENDIX**

*Supplementary Fig. 1.* Potential directed acyclic graph (DAG) for the causal relationship between patient (and clinician) anxiety and the receipt of subsequent treatment in patients undergoing active surveillance for small renal masses (SRM).

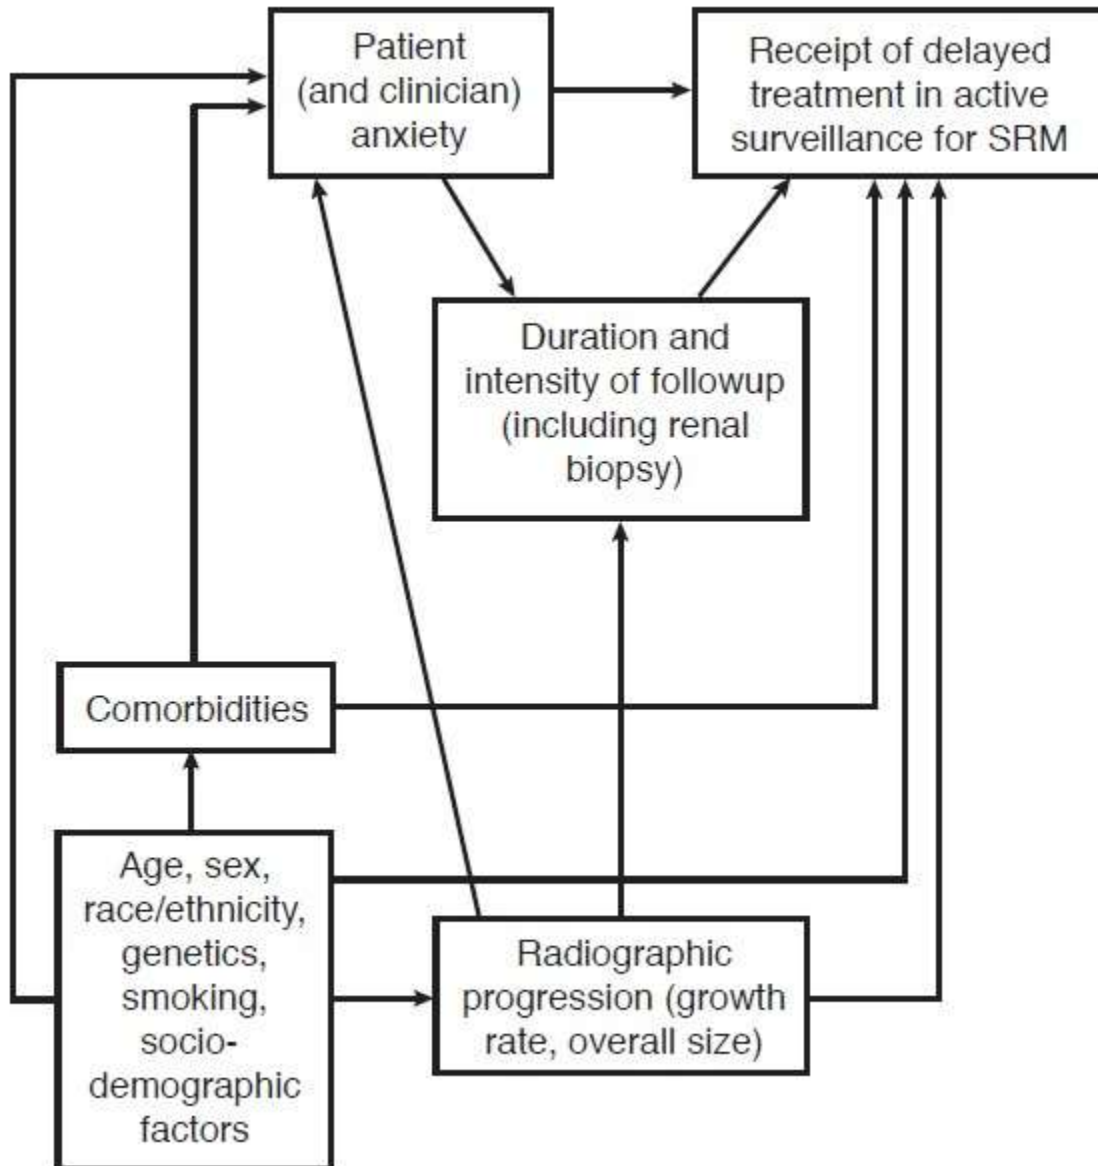

Supplement: 7451_Appendix.pdf [file 7451_Appendix.pdf]
